# Supplementary material
Source: PubMed Central journal article supplement (PMC5787338)
Supplement: NIHMS867902-supplement-supplement_1.pdf [file NIHMS867902-supplement-supplement_1.pdf]

**Supplementary Table 1.** Sequences of primers in RT-qPCR.

| Genes             | Forward primers          | Reverse primers           |
|-------------------|--------------------------|---------------------------|
| mice $\beta$ -MHC | TTTCTGGCGACAAAGACAGGG    | CTTGCCAAAACGGGAGGAGTT     |
| mice ANP          | GCTTCCAGGCCATATTGGAG     | GGGGGCATGACCTCATCTT       |
| mice IGF1         | GTGAGCCAAAGACACACCCA     | ACCTCTGATTTTCCGAGTTGC     |
| mice DES          | GTGGATGCAGCCACTCTAGC     | TTAGCCGCGATGGTCTCATAAC    |
| mice ADM          | CACCCTGATGTTATTGGGTTCA   | TTAGCGCCCACCTTATTCCACT    |
| mice CTGF         | GGGCCTCTTCTGCGATTTTC     | ATCCAGGCAAGTGCATTGGTA     |
| mice OPN          | AGCAAGAACTCTTCCAAGCAA    | GTGAGATTTCGTCAGATTTCATCCG |
| mice GAL3         | AGACAGCTTTTCGCTTAACGA    | GGGTAGGCACTAGGAGGAGC      |
| mice MMP1         | AACTACATTTTAGGGGAGAGGTGT | GCAGCGTCAAGTTTAACTGGAA    |
| mice MMP13        | CTTCTTCTTGTTGAGCTGGACTC  | CTGTGGAGGTCAGTGTAGACT     |
| mice MMP24        | GCATCTGCGTTGCATTCTGG     | CACTCGATTGTTGTCTGATCCA    |
| mice TIMP1        | GCAACTCGGACCTGGTCATAA    | CGGCCCGTGATGAGAACT        |
| mice TIMP2        | TCAGAGCCAAAGCAGTGAGC     | GCCGTGTAGATAAACTCGATGTC   |
| mice TIMP3        | CTTCTGCAACTCCGACATCGT    | GGGGCATCTTACTGAAGCCTC     |
| mice TIMP4        | TGTGGCTGCCAAATCACCA      | TCATGCAGACATAGTGCTGGG     |
| mice COL1a        | GCTCCTCTTAGGGGCCACT      | CCACGTCTCACCATTGGGG       |
| mice COL4a        | CTGGCACAAAAGGGACGAG      | ACGTGGCCGAGAATTTCCACC     |
| mice FN1          | ATGTGGACCCCTCCTGATAGT    | GCCCAGTGATTTTCAGCAAAGG    |
| Rat ANP           | TCGTCTTGGCCTTTTGGCT      | TCCAGGTGGTCTAGCAGGTTCT    |
| Rat BNP           | CTAGCCAGTCTCCAGAACAATC   | AGCTGTCTCTGAGCCATTTTC     |
| Rat IGF1          | GTGGACGCTCTTCAGTTC       | CAGCCTCCTCAGATCACA        |
| Rat DES           | CATTGCGGCTAAGAACATC      | TGTCGGTATTCCATCATCTC      |
| Rat ADM           | CTCAGCAAGGTGTAAGGTT      | CATCCACAGGCGGTAATC        |

**Supplementary Table 2.** The dilutions and sources of antibodies in immunoblotting.

| Antibodies     | Antibody sources          | Dilution |
|----------------|---------------------------|----------|
| MMP24          | Sigma                     | 1:1000   |
| FN1            | Sigma                     | 1:1000   |
| Bax            | Cell signaling technology | 1:1000   |
| Bcl-2          | Cell signaling technology | 1:1000   |
| P-JNK          | Cell signaling technology | 1:1000   |
| JNK            | Cell signaling technology | 1:1000   |
| P-C-JUN        | Cell signaling technology | 1:1000   |
| C-JUN          | Cell signaling technology | 1:1000   |
| $\beta$ -Actin | Abcam                     | 1:2000   |
